# Supplementary material
Source: PubMed Central journal article supplement (PMC7001000)
Supplement: mmc1.pdf [file mmc1.pdf]

YMTHE, Volume 28

## **Supplemental Information**

### **Effective and Accurate Gene Silencing**

**by a Recombinant AAV-Compatible**

### **MicroRNA Scaffold**

**Jun Xie, Phillip W.L. Tai, Alexander Brown, Shoufang Gong, Sha Zhu, Yi Wang, Chengjian Li, Cansu Colpan, Qin Su, Ran He, Hong Ma, Jia Li, Hanqing Ye, Jihye Ko, Phillip D. Zamore, and Guangping Gao**

Supplementary Figure 1

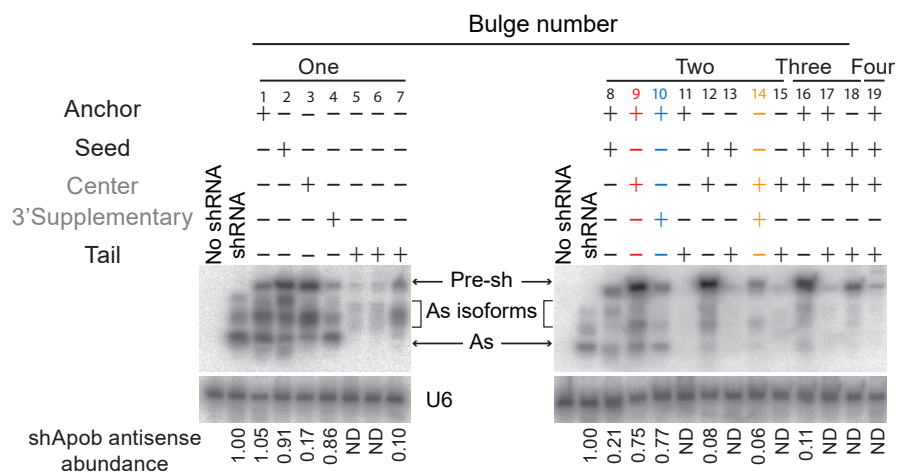

**Supplementary Figure 1. Small RNA Northern blot analysis of shApob antisense levels in HEK293 cells transfected with the shApob constructs with/without bulge. As, shApob antisense; Pre-sh, shApob precursors.**

Supplementary Figure 2

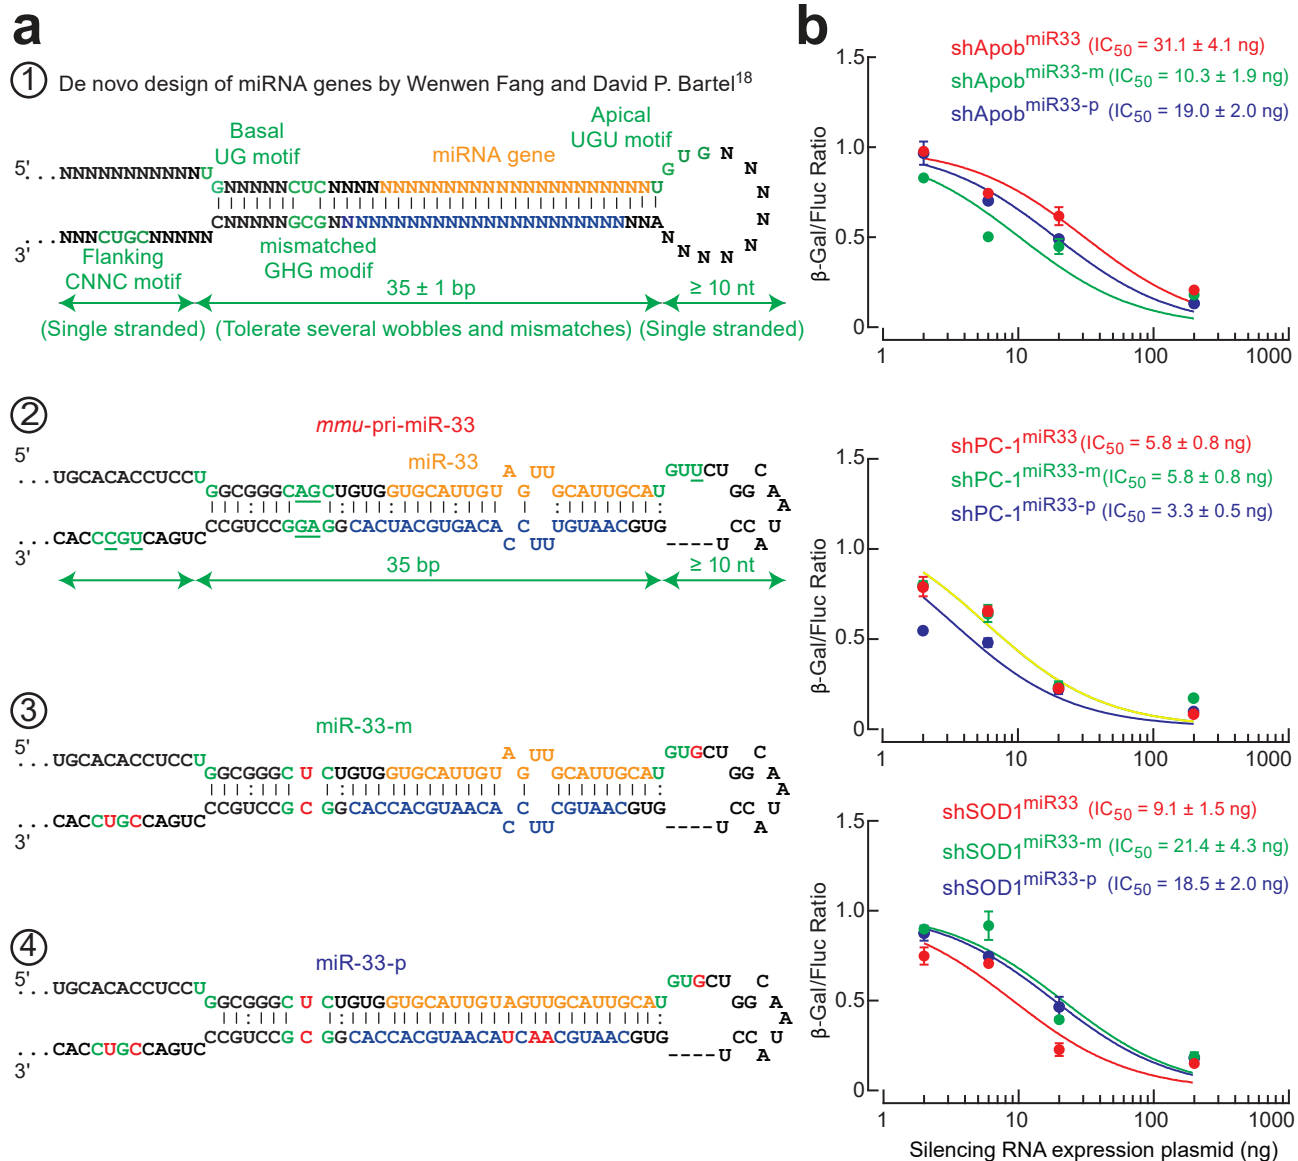

**Supplementary Figure 2. Engineering the motif features of miRNA genes into the pri-*mmu*-miR-33 scaffold.**

(a) Motifs (nucleotides in green) in miRNA genes described by Weiwei Fu and David P Bartel<sup>29</sup> (structure 1) and in *mmu*-pri-miR-33 (structure 2). The underlined variable nucleotides in *mmu*-pri-miR-33 were converted into the motifs of miRNA genes (red nucleotides in structures 3 and 4) to generate two modified miR-33 scaffolds. (b) Dose response curves for knockdown efficacy in the *Apo<sup>b</sup>*, *PC1*, and *SOD1* genes in HEK293 cells transfected with the shRNA<sup>miR-33</sup> and modified shRNA<sup>miR-33</sup> plasmids from 2 to 200 ng/well, together with their sensor plasmids (200 ng/well). Values are mean ± SD. IC<sub>50</sub> values are listed for each construct. Note that the shPC-1<sup>miR-33</sup> and shPC-1<sup>miR33-m</sup> datapoints are overlapping (yellow curve).

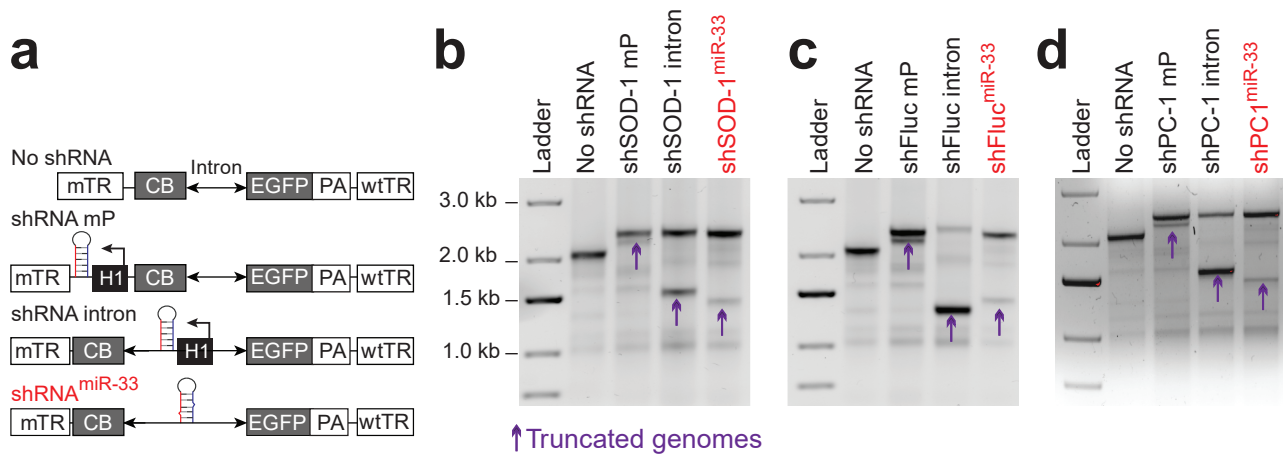

**Supplementary Figure 3. Vector genome populations in purified rAAV gene silencing vectors**

(a) Schematic of gene silencing constructs used for AAV packaging. (b-d) Agarose gel analysis of viral DNA extracted from purified vectors harboring shRNA or shRNA<sup>miR-33</sup> against SOD-1, Fluc, and PC-1. The shFluc intron vector in panel (c) harbors the shRNA cassette in close proximity to the EGFP transgene, while the intronic shSOD-1 and shPC-1 vectors harbor the shRNA cassette in close proximity to the CB promoter as shown in panel (a). Purple arrows indicate truncated genomes caused by shRNA-encoding sequences or the miR-33 scaffold. The small truncated genomes are caused by obligate palindromic sequences residing in vector genomes as we previously reported<sup>(16)</sup>.

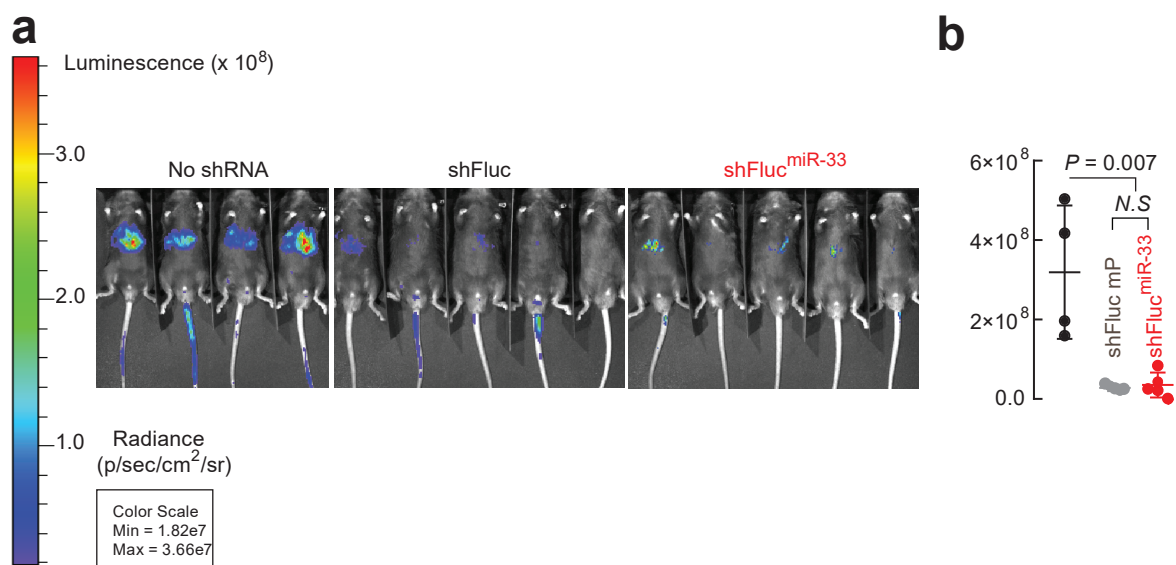

**Supplementary Figure 4. Bioluminescence levels from mice co-injected with rAAV9-Fluc at  $1.0 \times 10^{11}$  GCs/mouse and rAAV9-no shRNA, shFluc, or shFluc<sup>miR-33</sup> at  $5.0 \times 10^{11}$  GCs/mouse. (a) Live luminescence maging of mice treated with AAV vectors for three weeks. (b) Photo flux of liver region.**

Supplementary Figure 5

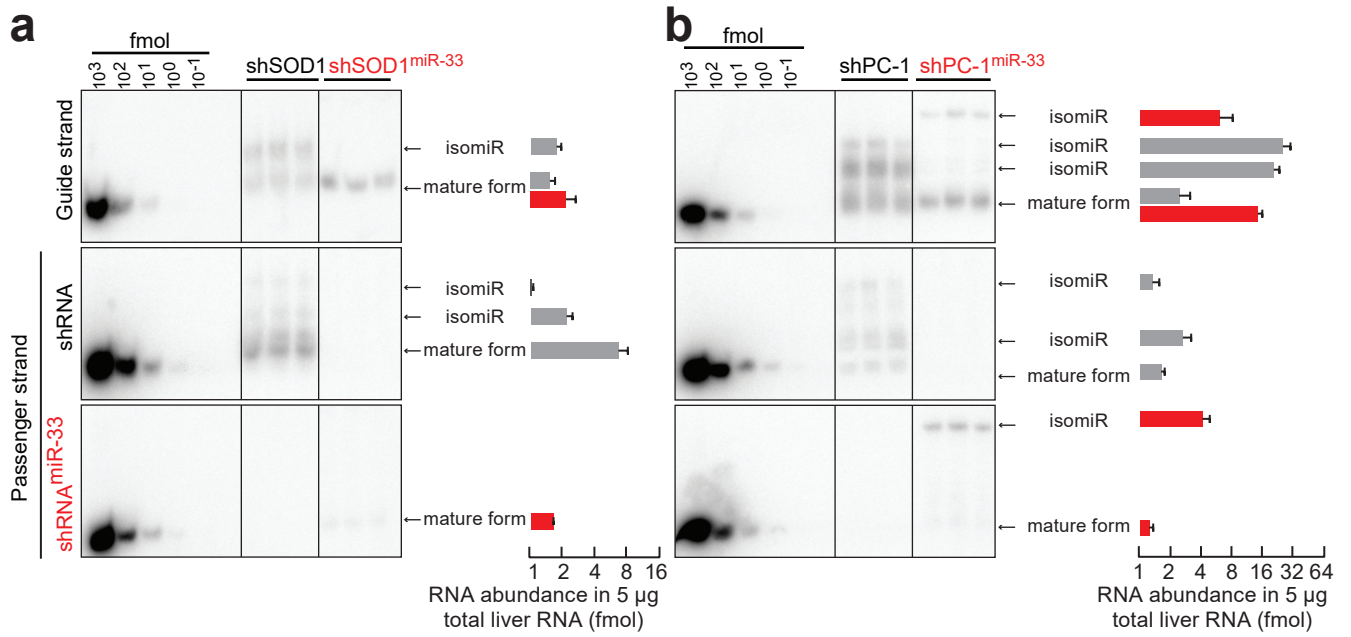

**Supplementary Figure 5. Northern blot analysis of transcribed RNA from shSOD1 or shSOD1<sup>miR-33</sup> (a), shPC-1 or shPC-1<sup>miR-33</sup> (b) in HEK 293 cells.**

Total RNA was extracted from the HEK 293 cells 48 hours after transfection. Five micrograms of total RNA were used for Northern blot analysis. Synthetic oligonucleotides at indicated amount were used as reference for quantification. The transcribed RNAs from shRNA and shRNA<sup>miR-33</sup> are in grey and red, respectively.

Supplementary Figure 6

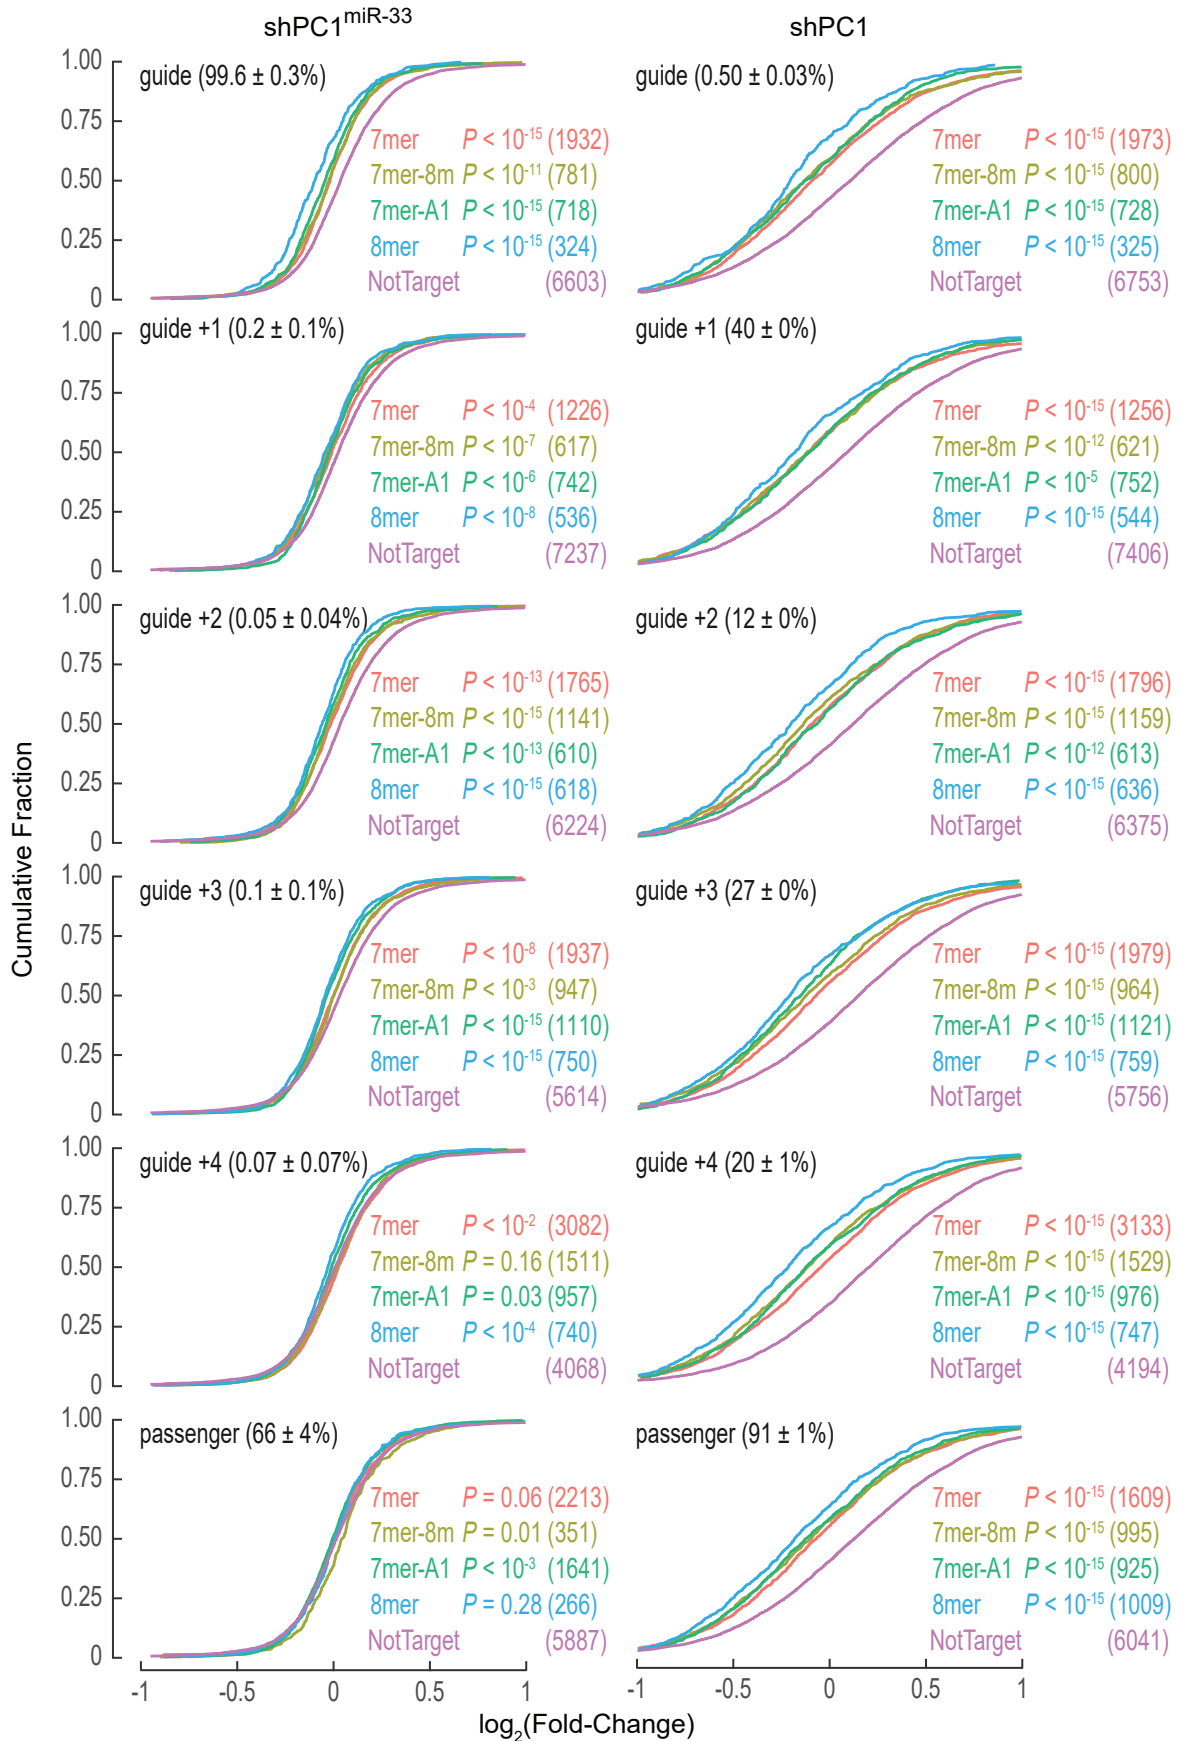

**Supplementary Figure 6. Imprecise process of shRNA causes off-target knockdown.**

Protein-coding genes are categorized based on pairing of their 3' UTR sequences to difference guide isoforms. The acumulative distribution of log<sub>2</sub> fold-change compared to control (NotTarget) is plotted. Guide +1, +2, +3, or +4: guide isoform whose 5' ends shift 1, 2, 3, or 4 nucleotides towards the 3' end.

**Supplementary Table 1: Oligonucleotides used in this study.**

| Oligonucleotides     | Sequence (5' to 3')           | Aims                                |
|----------------------|-------------------------------|-------------------------------------|
| <i>pri-miR-122</i> F | ATCGGGCCCGACTGCAGTTTCAGCGTTTG | Cloning of mouse <i>pri-miR-122</i> |
| <i>pri-miR-122</i> R | CGCGGGCCCGACTTTACATTACACACAAT |                                     |
| <i>pri-miR-33</i> F  | AGGGCTCTGCGTTTGCTCCAGG        | Cloning of mouse <i>pri-miR-33</i>  |
| <i>pri-miR-33</i> R  | AGGGTGACACTGTCCTTATT          |                                     |
| <i>pri-miR-26a</i> F | GCCCCTTCTCTTTGGCAG            | Cloning of mouse <i>pri-miR-26a</i> |
| <i>pri-miR-26a</i> R | TTGGCCAGCAAGCTTGG             |                                     |
| <i>pri-miR-126</i> F | GGAAGGCATTGTGGGGCGTAA         | Cloning of mouse <i>pri-miR-126</i> |
| <i>pri-miR-126</i> R | TGCAAAGTCTCTGGCTGTC           |                                     |
| <i>pri-miR-22</i> F  | ATTTCAGGTCGTCCCATATGTC        | Cloning of mouse <i>pri-miR-22</i>  |
| <i>pri-miR-22</i> R  | GTCCCTCACCTTCCGGATGATAG       |                                     |
| <i>pri-miR-199</i> F | CTCAGTCCTGGGCCTACTTTTTCCA     | Cloning of mouse <i>pri-miR-199</i> |
| <i>pri-miR-199</i> R | TGCCACGTCAGAAGAGTTCAG         |                                     |
| <i>pri-miR-99</i> F  | GGATTCCCAGCCTTTAAAATATTTAC    | Cloning of mouse <i>pri-miR-99</i>  |
| <i>pri-miR-99</i> R  | GGATTAAGATCCATGAAG            |                                     |
| <i>pri-miR-21</i> F  | GATATCGACTGTTGGCATTAAAGCCCC   | Cloning of mouse <i>pri-miR-21</i>  |
| <i>pri-miR-21</i> R  | GACTTTCCAAGTCTCACAAG          |                                     |
| <i>pri-miR-375</i> F | ACCGCGGTGCTCAGGTGAGAG         | Cloning of mouse <i>pri-miR-375</i> |
| <i>pri-miR-375</i> R | CAGAGACTGAGCACGGT             |                                     |
| <i>pri-miR-101</i> F | TTTTGCCTCCATCCAGAAGTGC        | Cloning of mouse <i>pri-miR-101</i> |
| <i>pri-miR-101</i> R | GGAAGAGTGGTGAACACAGGA         |                                     |
| <i>pri-miR-451</i> F | AGTCTGGGTACCCACCTCCAGAG       | Cloning of mouse <i>pri-miR-451</i> |
| <i>pri-miR-451</i> R | GCACAGTGAAGAGGAAAATGTACCC     |                                     |
| <i>pri-miR-194</i> F | AGGTACAGGCTAGGTCTTGTC         | Cloning of mouse <i>pri-miR-194</i> |
| <i>pri-miR-194</i> R | AGCTCCGTGCTCCGTAGTCT          |                                     |
| <i>pri-miR-30a</i> F | GTGTTTGACACTTAGTAGATGA        | Cloning of mouse <i>pri-miR-30a</i> |
| <i>pri-miR-30a</i> R | AATATATTTCTTTGCTTAGC          |                                     |
| <i>pri-miR-155</i> F | TTTCTCTTTGCAGGTGCTGC          | Cloning of mouse <i>pri-miR-155</i> |



|                                       |                                                                                                                                                                                                                                                                                                                         |                                                                            |
|---------------------------------------|-------------------------------------------------------------------------------------------------------------------------------------------------------------------------------------------------------------------------------------------------------------------------------------------------------------------------|----------------------------------------------------------------------------|
| <i>pri-miR-155 R</i>                  | GTCTGACATCTACGTTTCATC                                                                                                                                                                                                                                                                                                   |                                                                            |
| <i>shApob</i>                         | CTGACTTTCATCTGTACTACATTCAAGAGATGTAGTACAG<br>ATGAAAGTCAGTTTTT                                                                                                                                                                                                                                                            | Synthetic oligo for silencing<br><i>Apob</i> gene                          |
| <i>shPC1</i>                          | CGGGATTCTACCAGATATCTATTCAAGAGATAGATATCTG<br>GTAGAATCCCCGTTTTT                                                                                                                                                                                                                                                           | Synthetic oligo for silencing<br><i>PC1</i> gene                           |
| <i>shSOD1</i>                         | CATCATCAATTCGAGCAGAATTCAAGAGATTCTGCTCGA<br>AATTGATGATGTTTTT                                                                                                                                                                                                                                                             | Synthetic oligo for silencing<br><i>SOD1</i> gene                          |
| <i>shFluc</i>                         | TTGACAAATACGATTTATCTATTCAAGAGATAGATAAATC<br>GTATTTGTCAATTTTT                                                                                                                                                                                                                                                            | Synthetic oligo for silencing<br><i>Fluc</i> gene                          |
| <i>Apob sensor-F</i>                  | CGCCTCGAGAAATTGAAGAAGATCTGTTAAC                                                                                                                                                                                                                                                                                         | To generate partial <i>Apob</i> CDS<br>as <i>shApob</i> sensor element     |
| <i>Apob sensor-R</i>                  | CGCGCGGCCGCTCTTCTCTGGAGGGGACTGT                                                                                                                                                                                                                                                                                         |                                                                            |
| <i>PC1 sensor-F</i>                   | CGCCTCGAGCCCAAAATGAATGCTTCTTTCTCG                                                                                                                                                                                                                                                                                       | To generate partial <i>PC1</i> CDS<br>as <i>shPC1</i> sensor element       |
| <i>PC1 sensor-R</i>                   | CGCGCGGCCGCCCTGAAGAATCTGGTTCTTC                                                                                                                                                                                                                                                                                         |                                                                            |
| <i>hSOD1 sensor-F</i>                 | ATAACTCGAGCGAAGGCCGTGTGCGTGCTGAAGGGC                                                                                                                                                                                                                                                                                    | To generate partial <i>hSOD1</i><br>CDS as <i>shSOD1</i> sensor<br>element |
| <i>hSOD1 sensor-R</i>                 | GCCAGCGGCCGCTTGGGGCATCCCAATTACACCACAAG                                                                                                                                                                                                                                                                                  |                                                                            |
| <i>shApob<sup>miR-33</sup> gBlock</i> | AGATCTAGGGCTCTGCGTTTGCTCCAGGTAGTCCGCTGCT<br>CCCTTGGGCCTGGGCCACTGACAGCCCTGGTGCCTCTGG<br>CCGGCTGCACACCTCCTGGCGGGCAGCTGTGTGTAGTAC<br>AGATGAAAGTCAGTGTCTGGCAATACCTGCTGACTTTAC<br>TATGTACTACACACGGAGGCCTGCCCTGACTGCCACGGT<br>GCCGTGGCCAAAGAGGATCTAAGGGCACCGCTGAGGGCC<br>TACCTAACCATCGTGGGGAATAAGGACAGTGTACCCTTT<br>TTCTGCAG  | To generate <i>shApob<sup>miR-33</sup></i>                                 |
| <i>shPC1<sup>miR-33</sup> gBlock</i>  | AGATCTAGGGCTCTGCGTTTGCTCCAGGTAGTCCGCTGCT<br>CCCTTGGGCCTGGGCCACTGACAGCCCTGGTGCCTCTGG<br>CCGGCTGCACACCTCCTGGCGGGCAGCTGTGTAGATATCT<br>GGTAGAATCCCGTGTCTGGCAATACCTGCGGGATTCGCC<br>AAGATCTCTACACGGAGGCCTGCCCTGACTGCCACGGT<br>GCCGTGGCCAAAGAGGATCTAAGGGCACCGCTGAGGGCC<br>TACCTAACCATCGTGGGGAATAAGGACAGTGTACCCTTT<br>TTCTGCAG  | To generate <i>shPC1<sup>miR-33</sup></i>                                  |
| <i>shSOD1<sup>miR-33</sup> gBlock</i> | AGATCTAGGGCTCTGCGTTTGCTCCAGGTAGTCCGCTGCT<br>CCCTTGGGCCTGGGCCACTGACAGCCCTGGTGCCTCTGG<br>CCGGCTGCACACCTCCTGGCGGGCAGCTGTGTCTGCTCG<br>AAATTGATGATGTGTTCTGGCAATACCTGCATCATCATAT<br>CCGAGCAGAACACGGAGGCCTGCCCTGACTGCCACGGT<br>GCCGTGGCCAAAGAGGATCTAAGGGCACCGCTGAGGGCC<br>TACCTAACCATCGTGGGGAATAAGGACAGTGTACCCTTT<br>TTCTGCAG  | To generate <i>shSOD1<sup>miR-33</sup></i>                                 |
| <i>shFluc<sup>miR-33</sup> gBlock</i> | AGATCTAGGGCTCTGCGTTTGCTCCAGGTAGTCCGCTGCT<br>CCCTTGGGCCTGGGCCACTGACAGCCCTGGTGCCTCTGG<br>CCGGCTGCACACCTCCTGGCGGGCAGCTGTGTAGATAAA<br>TCGTATTTGTCAATGTTCTGGCAATACCTGTTGACAAAAT<br>CAATTTATCTACACGGAGGCCTGCCCTGACTGCCACGGT<br>GCCGTGGCCAAAGAGGATCTAAGGGCACCGCTGAGGGCC<br>TACCTAACCATCGTGGGGAATAAGGACAGTGTACCCTTT<br>TTCTGCAG | To generate <i>shFluc<sup>miR-33</sup></i>                                 |
| <i>Apob-F</i>                         | GTCCAGGTTGAATCACGGGT                                                                                                                                                                                                                                                                                                    | qRT-PCR for <i>apob</i> mRNA                                               |
| <i>Apob-R</i>                         | AGGATCCTGCAAGGTCAAGC                                                                                                                                                                                                                                                                                                    |                                                                            |

|                                                                                                      |                                   |                                                                          |
|------------------------------------------------------------------------------------------------------|-----------------------------------|--------------------------------------------------------------------------|
| <i>PC1</i> -F                                                                                        | AAAGGCCGCTGCTTTGAAAG              | qRT-PCR for <i>pc1</i> mRNA                                              |
| <i>PC1</i> -R                                                                                        | CCGCACCTGAATTTGTTGCA              |                                                                          |
| <i>Actin</i> -F                                                                                      | ATGCCAACACAGTGCTGTCTGG            | qRT-PCR for <i>actin</i> mRNA                                            |
| <i>Actin</i> -R                                                                                      | TGCTTGCTGATCCACATCTGCT            |                                                                          |
| <i>Egfp</i> -F                                                                                       | AGCAAAGACCCCAACGAGAA              | Quantification of AAV genome copies in liver and AAV vector preparations |
| <i>Egfp</i> -R                                                                                       | GGCGGCGGTCACGAA                   |                                                                          |
| <i>Egfp</i> -probe                                                                                   | 6FAM-CGCGATCACATGGTCCTGCTGG-TAMRA |                                                                          |
| <i>shApob</i> and <i>shApob<sup>miR-33</sup></i><br>AS probe; standard for<br><i>shApob</i> sense    | GACTTTCATCTGTACTACA               | Probe and standard for small RNA Northern blot                           |
| <i>shPC-1</i> and <i>shPC-1<sup>miR-33</sup></i><br>AS probe; standard for<br><i>shPC-1</i> sense    | CGGGATTCTACCAGATATCTA             |                                                                          |
| <i>shSOD-1</i> and <i>shSOD-1<sup>miR-33</sup></i><br>AS probe; standard for<br><i>shSOD-1</i> sense | CATCATCAATTTGAGCAGAA              |                                                                          |
| <i>shApob<sup>miR-33</sup></i> sense probe                                                           | GTGTGTAGTACATAGTAAAGTC            |                                                                          |
| <i>shPC-1<sup>miR-33</sup></i> sense probe                                                           | GTGTAGATATCTTGGCGAATCC            |                                                                          |
| <i>shSOD-1<sup>miR-33</sup></i> sense probe                                                          | GTGTTCTGCTCGGATATGATGA            |                                                                          |
| <i>shApob<sup>miR-33</sup></i> sense<br>reference                                                    | GACTTTACTATGTACTACACAC            |                                                                          |
| <i>shPC-1<sup>miR-33</sup></i> sense<br>reference                                                    | GGATTCCGCAAGATATCTACAC            |                                                                          |
| <i>shSOD-1<sup>miR-33</sup></i> sense<br>reference                                                   | TCATCATATCCGAGCAGAACAC            |                                                                          |
| <i>shApob</i> sense probe;<br>standard for <i>shApob</i> and<br><i>shApob<sup>miR-33</sup></i> AS    | TGTAGTACAGATGAAAGTCAG             |                                                                          |
| <i>shPC-1</i> sense probe;<br>standard for <i>shPC-1</i> and<br><i>shPC-1<sup>miR-33</sup></i> AS    | TAGATATCTGGTAGAATCCCG             |                                                                          |
| <i>shSOD-1</i> sense probe;<br>standard for <i>shSOD-1</i> and<br><i>shSOD-1<sup>miR-33</sup></i> AS | TTCTGCTCGAAATTGATGATG             |                                                                          |
| <i>U6</i> probe                                                                                      | CTCTGTATCGTTCCAATTTTAGTATA        |                                                                          |

**Supplementary Table 2:** Decreased mRNAs in AAV-*shPCI* treated mice

| Seed type | Guide | Guide+1 | Guide+2 | Guide+3 | Guide+4 |
|-----------|-------|---------|---------|---------|---------|
| 7mer      | 283   | 204     | 250     | 269     | 413     |
| 7mer-8m   | 131   | 107     | 192     | 163     | 241     |
| 7mer-A1   | 124   | 122     | 82      | 175     | 146     |
| 8mer      | 62    | 103     | 134     | 164     | 181     |
| No Target | 615   | 679     | 557     | 444     | 234     |
| Sum       | 1215  | 1215    | 1215    | 1215    | 1215    |

**Supplementary Table 3:** Decreased mRNAs in AAV-*shPCI*<sup>miR-33</sup>-treated mice

| Seed type  | Guide | Guide+1 | Guide+2 | Guide+3 |
|------------|-------|---------|---------|---------|
| 7mer       | 18    | 15      | 17      | 16      |
| 7mer-8m    | 10    | 6       | 7       | 12      |
| 7mer-A1    | 8     | 3       | 6       | 3       |
| 8mer       | 6     | 9       | 13      | 8       |
| Not Target | 51    | 60      | 50      | 54      |
| Sum        | 93    | 93      | 93      | 93      |

**Supplementary Table 4:** Dysregulated genes in AAV-*shPCI*<sup>miR-33</sup>-treated mice and PC-1 loss-of-function patients

|                 | Increased genes                                           |                                                                             | Decreased genes                                           |                                                                             |
|-----------------|-----------------------------------------------------------|-----------------------------------------------------------------------------|-----------------------------------------------------------|-----------------------------------------------------------------------------|
|                 | PC-1 loss-of-function patients vs healthy controls (fold) | AAV- <i>shPCI</i> <sup>miR-33</sup> vs AAV- <i>Egfp</i> treated mice (fold) | PC-1 loss-of-function patients vs healthy controls (fold) | AAV- <i>shPCI</i> <sup>miR-33</sup> vs AAV- <i>Egfp</i> treated mice (fold) |
| <i>Akl</i>      | 5.4                                                       | 2.7                                                                         | <i>Arid5b</i>                                             | 0.11                                                                        |
| <i>Anp32b</i>   | 11.3                                                      | 2.4                                                                         | <i>Fasn</i>                                               | 0.07                                                                        |
| <i>Hist1h1c</i> | 29.3                                                      | 1.5                                                                         | <i>Hmgcr</i>                                              | < 0.01                                                                      |
| <i>Lrrc42</i>   | 9                                                         | 1.7                                                                         | <i>Lss</i>                                                | < 0.01                                                                      |
| <i>Map7d1</i>   | 3.1                                                       | 1.5                                                                         | <i>Mme</i>                                                | 0.03                                                                        |
| <i>Mgat4b</i>   | 7.4                                                       | 1.6                                                                         | <i>Tfrc</i>                                               | 0.23                                                                        |
| <i>Pgp</i>      | 19.3                                                      | 1.8                                                                         | <i>Cers6</i>                                              | 0.03                                                                        |
| <i>Arhgef1</i>  | 8.1                                                       | 1.6                                                                         | <i>Myc</i>                                                | 0.19                                                                        |
| <i>Colla1</i>   | 54.8                                                      | 1.7                                                                         | <i>Nt5e</i>                                               | 0.04                                                                        |
| <i>Gigyf1</i>   | 2.7                                                       | 1.6                                                                         |                                                           |                                                                             |
| <i>Ncor2</i>    | 4.7                                                       | 1.8                                                                         |                                                           |                                                                             |
| <i>Wdfy1</i>    | 3.4                                                       | 1.8                                                                         |                                                           |                                                                             |
